# Supplementary material for: Impact of Oncotype DX testing on ER+ breast cancer treatment and survival in the first decade of use
Source: Springer Nature journal article supplement (doi:10.1186/s13058-021-01453-4), 2021-07-17
Supplement: MOESM1 [file 19369800]

1

## **Supplementary Figures**

2

3

**Impact of Oncotype DX testing on ER-positive breast cancer treatment and survival in the first**

4

**decade of use**

5

Evelien Schaafsma, Baoyi Zhang, Merit Schaafsma, Chun-Yip Tong, Lanjing Zhang, Chao Cheng

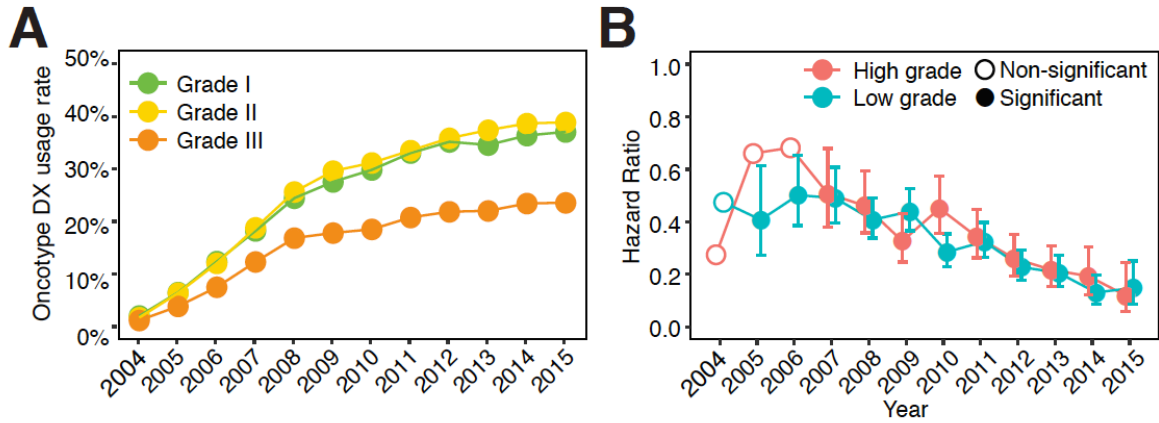

6

7 **Suppl. Figure 1. Oncotype DX usage rates and hazard ratios stratified by grade. A.** Oncotype DX

8 usage rate among the three breast cancer grades. Usage rates were calculated based on the total number of

9 patients within each indicated grade group. **B.** Hazard ratios of Oncotype DX usage stratified by tumor

10 grade between 2004 and 2015 from univariate Cox regression models.

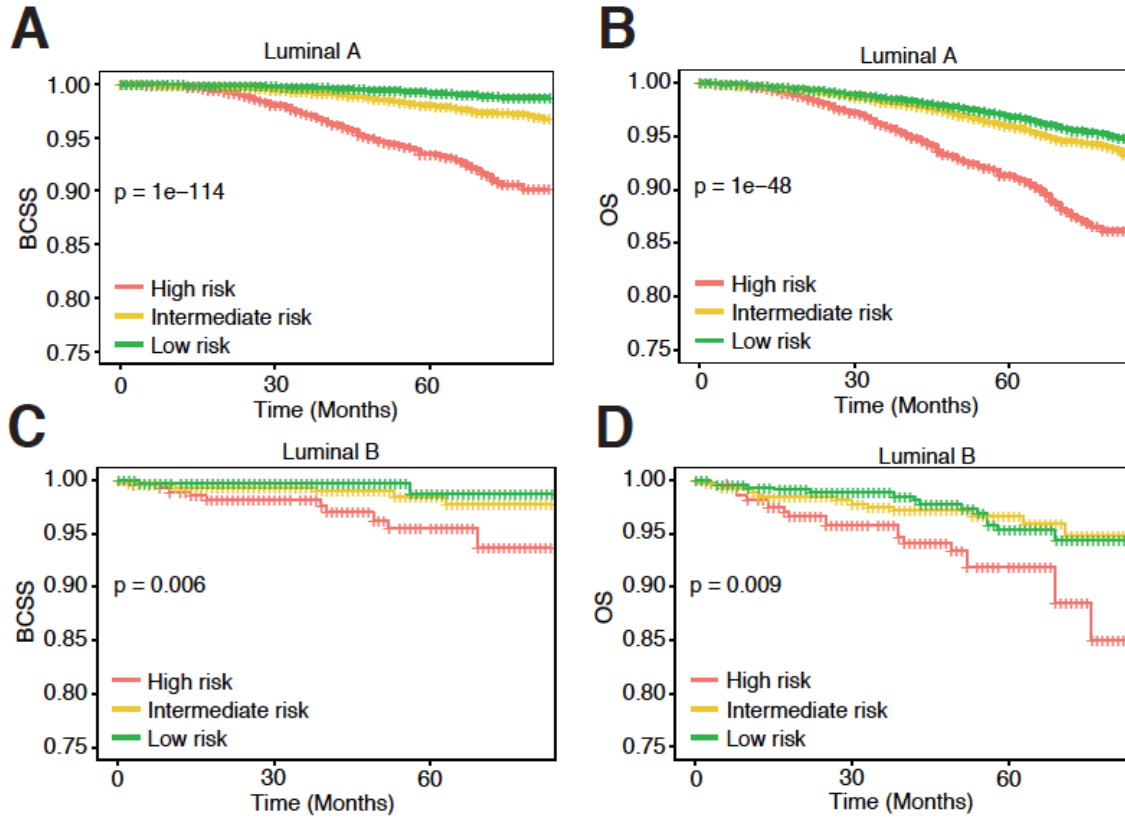

11

12 **Suppl. Figure 2. Oncotype DX score is predictive of patient's survival in Luminal A and Luminal B**

13 **breast cancer. A.** Survival plot of 3 risk groups classified by Oncotype DX (BCSS) in Luminal A breast

14 cancer. **B.** Survival plot of 3 risk groups classified by Oncotype DX (OS) in Luminal A breast cancer. **C.**

15 Survival plot of 3 risk groups classified by Oncotype DX (BCSS) in Luminal B breast cancer. **D.** Survival

16 plot of 3 risk groups classified by Oncotype DX (OS) in Luminal B breast cancer.
